# Supplementary material for: Investigating Susceptibility to Diabetes Using Features of the Adipose Tissue in Response to In Utero Polycyclic Aromatic Hydrocarbons Exposure
Source: PubMed Central journal article supplement — Diabetes Metab J. 2016 Aug 12;40(6):494–508. doi: 10.4093/dmj.2016.40.6.494 (PMC5167714; doi:10.4093/dmj.2016.40.6.494), 2016-08-12
Supplement: dmj-40-494-s001.pdf [file dmj-40-494-s001.pdf]

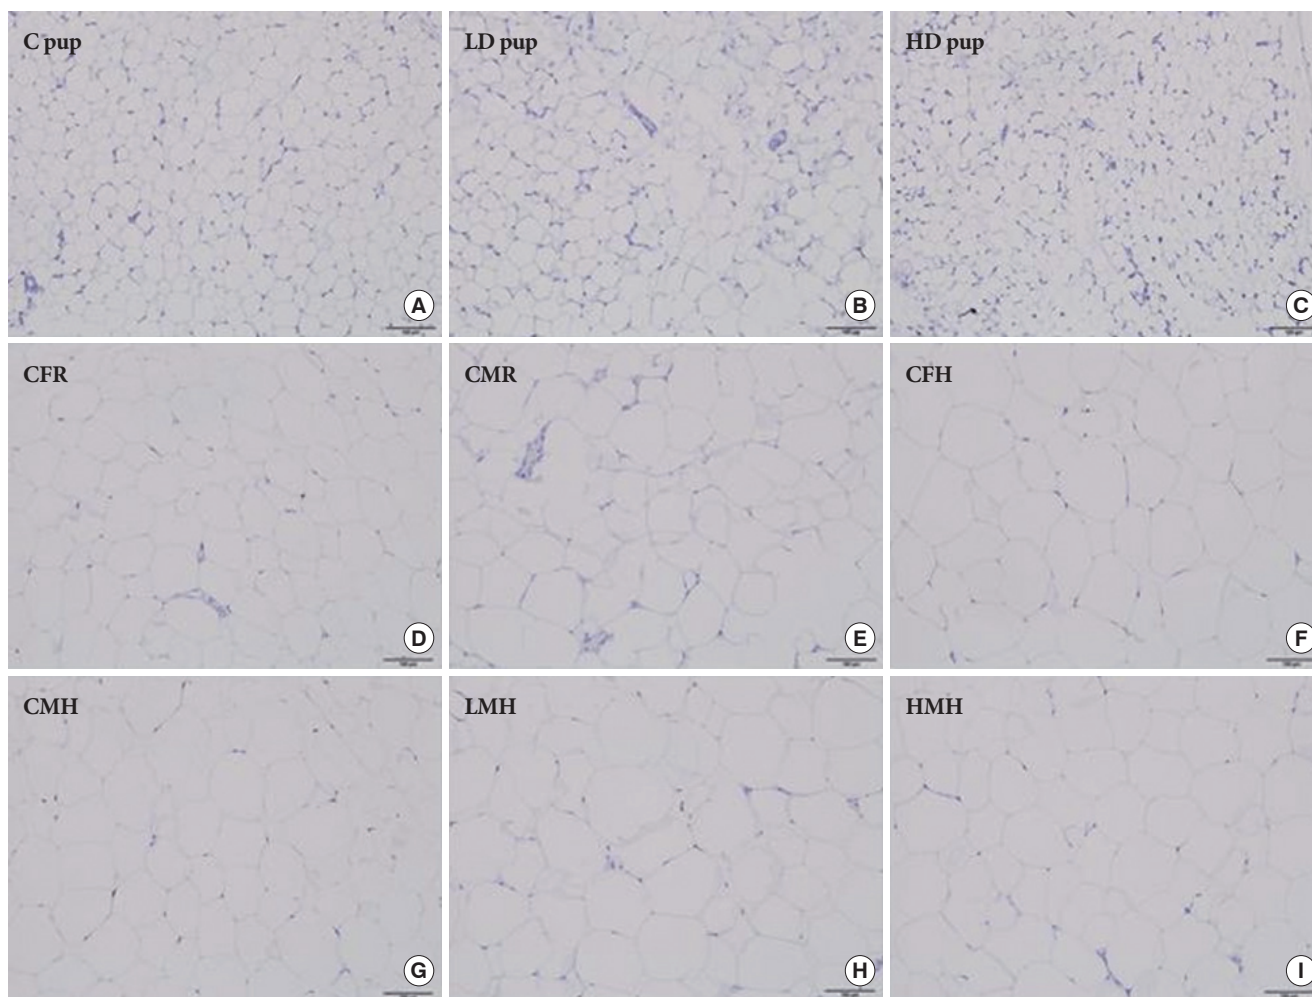

**Supplementary Fig. 1.** A select CD68 immunohistochemical staining (bar=50  $\mu$ m) in adipose tissue (AT) of Sprague Dawley rats offsprings whose mothers ingested 2-aminoanthracene (2AA) from gestation through postweaning. (A) Control (C) pup, 0 mg/kg, (B) low dose (LD) pup, 50 mg/kg, and (C) high dose (HD) pup, 100 mg/kg-2AA. Older pups were fed moderate high and regular diet for 6 weeks. Select images include: (D) control female regular diet (CFR); (E) control male regular diet (CMR); (F) control high fat diet (CFH); (G) control male high fat diet (CMH); (H) low dose male high fat (LMH); and (I) high dose male high fat diet (HMH). Moderate to strong, cytoplasmic staining of macrophages is scattered between adipocytes, which is more prominent in the young pups.
